1 **ShapeRotator: an R package for standardised rigid rotations of articulated Three-Dimensional**  
2 **structures with application for geometric morphometrics**

3

4

5 Marta Vidal-García<sup>1,\*</sup>, Lashi Bandara<sup>2</sup>, and J. Scott Keogh<sup>1</sup>

6

7

8

9 Author information:

10 <sup>1</sup>*Evolution, Ecology & Genetics, Research School of Biology, The Australian National University,*  
11 *Canberra, ACT, Australia*

12

13 <sup>2</sup>*Department of Mathematical Sciences, Chalmers University of Technology and University of*  
14 *Gothenburg, Gothenburg, Sweden*

15

16 \*Correspondence: Marta Vidal-García; Evolution, Ecology & Genetics, Research School of Biology,  
17 The Australian National University, Canberra ACT 2601; Australia

18 e-mail: [marta.vidalgarcia@anu.edu.au](mailto:marta.vidalgarcia@anu.edu.au)

19

20 **SHORT RUNNING TITLE**

21 Rigid rotation of 3D structures

## Summary

1. The quantification of complex morphological patterns typically involves comprehensive shape and size analyses, usually obtained by gathering morphological data from all the structures that capture the phenotypic diversity in an organism or object. Articulated structures are a critical component of overall phenotypic diversity, but data gathered from these structures is difficult to incorporate in to modern analyses because of the complexities associated with jointly quantifying 3D shape in multiple structures.
2. While there are existing methods for analysing shape variation in articulated structures in Two-Dimensional (2D) space, these methods do not work in 3D, a rapidly growing area of capability and research.
3. Here we describe a simple geometric rigid rotation approach that removes the effect of random translation and rotations, enabling the morphological analysis of 3D articulated structures. Our method is based on Cartesian coordinates in 3D space so it can be applied to any morphometric problem that also uses 3D coordinates (e.g. spherical harmonics). We demonstrate the method by applying it to a landmark-based data set for analysing shape variation using geometric morphometrics.
4. We have developed an R package (ShapeRotator) so that the method can be easily implemented in the commonly used software programs *geomorph* and *MorphoJ*. This method will be a valuable tool for 3D morphological analyses in articulated structures by allowing an exhaustive examination of shape and size diversity.

**Key words:** morphology – articulation – motion correction – multi-modular morphology

## Background

Data on shape and size variation is essential in many fields, including evolutionary biology and ecology, engineering, medical science, and anthropology (Loncaric 1998; McIntyre & Mossey 2003; Slice 2006). For most of these studies, one of the most widely used tools for analysing morphological variation within or between a group of organisms or objects are based on Cartesian coordinates of landmarks (Bookstein 1997).

Of the wide array of methods using Cartesian coordinates, geometric morphometrics (GM) is the most common, especially when analysing shape and size variation and covariation (Mitteroecker & Gunz 2009; Adams *et al.* 2013). The first two steps of this GM procedure consist of a landmark approach that: (1) gathers (two- or three-dimensional) coordinates of anatomically defined and homologous loci, followed by (2) a generalised Procrustes analysis (GPA) that superimposes configurations of each set of landmarks in all specimens, by removing all effects of size, translation and rotation, in order to only obtain shape information (Klingenberg 2008; Adams *et al.* 2013). Geometric morphometrics, therefore, allows accurate quantitative analyses of shape and size, in either Two-Dimensional (2D) or Three-Dimensional (3D) space.

3D morphological analyses are the most accurate, as objects and organisms exist in 3D space. The recent growth in x-ray micro CT scanning and surface scanning has seen a rapid increase in the application of 3D geometric morphometric techniques, but progress has been hampered by the lack of a simple method to incorporate data from complex articulated structures.

In evolutionary biology, identifying morphological differences among different groups or taxa is crucial in order to understand evolutionary processes and their relationship to the environment (Losos 1990; Ricklefs & Miles 1994; Pagel 1999). This can be difficult, especially if traits have co-evolved, or if morphological diversification has been hindered by phylogenetic legacy or trade-offs imposed by the organism's functional habitat (Ghalambor *et al.* 2007). Complex body shape patterns require more detailed analyses of shape, obtained by collecting data from several structures that capture the whole gamut of morphological variation in an organism. One example of this is the extraction and assembly of data from articulated structures, such as skeletons, for 3D analyses with geometric morphometric techniques. This is especially important in functional morphological studies, as they usually involve analysing more than one structure due to mechanical correlations or morphological integration. For example, jointly analysing skull and mandible could be crucial to disentangle the relationship between

diet and head shape evolution (Cornette *et al.* 2013). Similarly, collectively evaluating different modules in the limbs, especially when correlated to locomotion, or considering several structures across the whole body, could improve our understanding of the effect of environmental conditions on morphological evolution (Vidal-Garcia & Keogh, unpublished).

Unfortunately, non-rigid structures, such as articulated structures, will inevitably suffer the effects of natural or free rotation or translation events and be different in each individual and structure (Adams, 1999). These events could obstruct the correct quantification of shape variation by adding rotation artifacts to GM analyses (Adams *et al.* 2004). Thus, orientation of these structures needs to be corrected and standardised prior to performing shape analyses. Methods for shape analysis of landmark data in articulated structures already have been described but the solution to this problem has been implemented only in two-dimensional (2D) space (Adams, 1999).

Here we present the R package ShapeRotator: a simple geometric rigid rotation approach to study 3-Dimensional (3D) shape of articulated structures, or independent structures, within an organism. We describe a method that removes shape variation due to the effect of translation between independent structures and rotation generated by movement in an articulation, among others. Thus, our approach translates and rotates articulated (or even independent) structures in order to obtain a comparable shape data set once all effects of random movement and rotations have been removed (Fig. 1a).

We apply this method to a landmark-based data set for analysing shape variation using geometric morphometrics, and provide the example data set used in ShapeRotator (to be available in CRAN) to execute this rigid rotation. This rigid rotation then allows geometric morphometric analyses to be performed in the two best well-known 3D GM analytical software packages: *geomorph* (Adams & Otárola-Castillo 2013), and *MorphoJ* (Klingenberg 2011). This method also will allow exporting the rotated coordinates for posterior analyses in other software platforms, even outside of the field of geometric morphometrics. Since the basis of this method lies upon rigidly spinning any structure defined by 3D coordinates, it could be used in any other shape analyses that use coordinate data, such as continuous surface meshes used in spherical harmonics (Shen *et al.* 2009). Our method is a convenient addition to the rapidly evolving tool kit of geometric morphometrics because it allows a more comprehensive exploration of morphological diversity through the gathering of shape data from complex 3D structures.

## Methodology

We begin with a set of points  $\tilde{P} = \{\tilde{p}_0, \dots, \tilde{p}_M\} \subset \mathbb{R}^3$  which represents a 3D object, and are ordered so that  $\tilde{p}_0$  represents the base point and  $\tilde{p}_M$  represents the end point, by which we mean that this object has an axis starting from  $\tilde{p}_0$  and ending at  $\tilde{p}_M$ . Our goal is to rotate these points via a rigid motion so that the axis on which these two points sit is either on the  $X$ ,  $Y$  or  $Z$ -axis in  $\mathbb{R}^3$ . Rotation of vectors in  $\mathbb{R}^3$  is a well-known and easily resolved problem, and various formalisms exist in geometry. Thus, we translate our set of points  $\tilde{P}$  so that  $\tilde{p}_0$  maps to the origin  $(0, 0, 0)$ . This is a simple transformation  $T$  defined by:

$$(1) \quad p_i = T\tilde{p}_i = \tilde{p}_i - \tilde{p}_0$$

Note that the axis  $X = \text{span}\{(1, 0, 0)\}$ ,  $Y = \text{span}\{(0, 1, 0)\}$ ,  $Z = \text{span}\{(0, 0, 1)\}$ , where each of the generating vectors are unit. Let us fix our desired axis to which we rotate the object to be  $A = \text{span}\{a\}$  where  $a = (1, 0, 0)$ , or  $a = (0, 1, 0)$ , or  $a = (0, 0, 1)$ . Since we have translated points  $\{p_i\}$  and vectors correspond to positions, we are simply looking to rotate the vector  $p_M$  to  $A$ , and each other vector as a rigid motion with respect to this rotation. There are a number of ways to do this, but the simplest way is to consider the plane spanned by  $p_M$  and  $A$ , and then to rotate by the angle between  $p_M$  and  $A$  within this plane (Fig. 1b). Such a rotation is done via rotating on the axis to the plane, which is determined by a normal vector to this plane.

Let us describe this set-up slightly more generally. For two vectors  $u, v \in \mathbb{R}^3$ , the axis to the plane spanned by these two vectors is determined by a unit normal to the plane (there are two choices due to orientation), which we denote by  $N(u, v)$ :

$$(2) \quad N(u, v) = \frac{u \times v}{|u \times v|}$$

where  $\times$  is the *cross product*. The angle between these vectors is then given by  $\angle(u, v)$ :

$$(3) \quad \angle(u, v) = \arccos\left(\frac{u \cdot v}{|u||v|}\right)$$

where  $\cdot$  is the *dot (scalar) product* between vectors. The rotation matrix about an axis  $w \in \mathbb{R}^3$ , where  $w = (w_1, w_2, w_3)$  is a unit vector, of angle  $\theta$  radians is given by the well known matrix:

$$(4) \quad R'(w, \theta) =$$

$$\begin{pmatrix} \cos \theta + w_1^2(1 - \cos \theta) & w_1 w_2(1 - \cos \theta) - w_3 \sin \theta & w_1 w_3(1 - \cos \theta) + w_2 \sin \theta \\ w_2 w_1(1 - \cos \theta) + w_3 \sin \theta & \cos \theta + w_2^2(1 - \cos \theta) & w_2 w_3(1 - \cos \theta) - w_1 \sin \theta \\ w_3 w_1(1 - \cos \theta) - w_2 \sin \theta & w_3 w_2(1 - \cos \theta) + w_1 \sin \theta & \cos \theta + w_3^2(1 - \cos \theta) \end{pmatrix}$$

Thus, to obtain a rotation matrix which is the rigid motion rotating the vector  $u$  to  $v$  in the plane spanned by  $u$  and  $v$ , we obtain the expression:

$$(5) \quad R(u, v) = R'(N(u, v), \angle(u, v))$$

Getting back to our original problem, we set  $v = p_M$  and  $u = a$ , and then we have the rotated points:

$$(6) \quad r_i = R(p_M, a)p_i = R'(N(p_M, a), \angle(p_M, a))p_i$$

where  $R(p_M, a)p_i$  is the action of the matrix  $R(p_M, a)$  on the vector  $p_i$ .

It may be necessary to introduce a further constraint in the rotation. For instance, suppose  $a = (0, 1, 0)$

and there is a point  $p_i$ , now rotated to  $r_i$  via the method we describe, which should lie in the  $Y$ -axis.

That is, we need to further rotate  $r_i$  to a point  $r'_i = (*, *, 0)$ . To do this, we simply rotate in the axis  $a$ ,

by an angle  $\theta_Y(r_i) = \arctan((r_i)_3/(r_i)_1)$ , where  $r_i = ((r_i)_1, (r_i)_2, (r_i)_3)$ . That is,

$$(7) \quad r'_i = R(a, \theta_Y(r_i))r_i$$

## Implementation

### Overview of the ShapeRotator package

Here we illustrate the functions available within the ShapeRotator package and the basic steps required in order to successfully implement the rotation on a data set of 3D coordinates. ShapeRotator allows the rigid rotation of sets of both landmarks and semi-landmarks used in geometric morphometric analyses, enabling morphometric analyses of complex objects, articulated structures, or multiple parts within an object or specimen. The main steps required are: (1) importing the data and fixating the rotation axes, (2) translating the whole data set of coordinates or points so that the main selected point  $\tilde{p}_0 = (0, 0, 0)$ , and (3) rotating the two structures to the desired angle (as outlined on Fig. 2). This tutorial uses the example data set, which is included in this package.

### Importing a data set

In the example data set we use two geometric morphometric data sets containing both landmarks and semi-landmarks for two neighbouring and articulated bones (humerus and radioulna) from a group of several species of frogs (details in Appendix S1), in tps format. We first import the data sets using the R package *geomorph* (Adams & Otárola-Castillo 2013):

```
library(ShapeRotator)
```

```
library(geomorph)
```

```
radioulna <- readland.tps("radioulna.tps", specID = "ID", readcurves = F)
```

```
humerus <- readland.tps("humerus.tps", specID = "ID", readcurves = F)
```

These two GM data sets (radioulna and humerus) will be rotated on different rotation axes in order to conform the aimed angle between them. This process is not exclusive to two neighbouring structures, and thus, it could be performed for as many independent subunits as desired by choosing the different angles among different rotation axes and all the translation processes. For more help on importing the GM data sets please see Adams *et al.* (2014), and the associated help files. Please note that this method also works for semi-landmarks as long as they have been equally-distance positioned prior to the translation and the rigid rotation.

### Translating

During this step each structure will be translated to the point of origin so that  $\tilde{p}_0 = (0, 0, 0)$ , thus the distance from the coordinates of landmark\_a ( $A_x, A_y, A_z$ ) is subtracted from all the landmarks in all specimens, e.g. ( $N_x - A_x, N_y - A_y, N_z - A_z$ ) for landmark N. This translation is made with the function *translate()*, as it follows:

```
translated_radioulna <- translate (radioulna[RU_landmark_a, , 1], radioulna)
```

```
translated_humerus <- translate (humerus[H_landmark_a, , 1], humerus)
```

### Fixing the rotation axis

In order to fix a rotation axis in a structure we first need to select in our data set two suitable landmarks for each structure which the axis will go through: landmarks A and B (for the first structure), and landmarks D and E (for the other structure). In the radioulna example data set, landmark A is the landmark in the 1<sup>st</sup> position and landmark B is in the 10<sup>th</sup> position. Similarly, for the humerus data set, landmark D would be the landmark on the 52<sup>th</sup> position, and landmark E would be in the 19<sup>th</sup> position. Finally, we also need to select an extra landmark that shares the same value for at least one of its coordinates (two coordinates, ideally) with landmark b. This is needed for the simple reason that there is not information about the orientation of the structure with only two landmarks per structure, so even though the rigid rotation will work properly, it could position this structure in the wrong ('mirroring') orientation. Thus, this orientation issue is corrected through landmark C. In this example,

landmark C is the 17<sup>th</sup> landmark, while landmark F is the 107<sup>th</sup> landmark in the humerus data set. We need to know which landmarks will be selected in both structures prior to the rotation process.

## Rotating

In the rotation step, we will use the function `rotation()` in order to rigidly rotate the two structures to the desired angle, as it follows:

```
joined_dataset <- rotation(data.1 = translated_radioulna, data.2 = translated_humerus, land.a =
10, land.b=1, land.c=17, land.d=52, land.e=19, land.f=107, angle = 90)
```

The input datasets `data.1` and `data.2` correspond to the two translated datasets (in this case `translated_radioulna` and `translated_humerus`). We then use the selected landmarks as explained in the previous section. Finally, we include the angle (in degrees) that we would like to use to position the two structures to one another. One of the options of the function `rotation()` is to select the desired angle between the two structures so that we can perform the rigid rotation of each structure positioning them in the selected angle in relation to each other. In order to do so we use the internal function `vector.angle()`, by providing the desired angle in degrees (from 0° to 360°). The function `vector.angle()` will return a vector that forms that angle with the vector (1, 0, 0). In the example data set in `ShapeRotator` we rotate the coordinates from the two bones so that they form an angle of 90° degrees within each other:

```
New_vector <- vector.angle(90)
```

So that `New_vector = c(0, 1, 0)`. Thus we could check the vector that the function `rotator()` will use, based on the input angle. The output from the function `rotator()` is a 3D array with the two joined data sets (`data.1` and `data.2`). Please note that the two datasets are joined based on their dimnames. Thus, the order of the specimens in each dataset is not important, as long as all the cases match perfectly between the two datasets in the same specimen. If there are extra specimens for one of the datasets or the names do not match properly, `rotator()` will not include them in the output rotated joined dataset.

## Exporting



After the rotation process we could either use the joined GM array in further analyses or we could also export it and save it in order to use it in another software, such as MorphoJ (Klingenberg 2011). In this step we will be using the function `writeland.tps()` in the R package *geomorph* (Adams & Otárola-Castillo 2013) in order to save a tps file from the joined GM array:

```
writeland.tps(A="joined_arm", file = "joined_arm.tps", scale = NULL)
```

## Other applications

Our method is an important addition to the tool kit of the geometric morphometrics field. It will facilitate the analyses of compound 3D morphological datasets in geometric morphometrics analyses but will also be useful outside of this field as it can be applied to any method that uses 3D coordinates. The examples of applications are numerous in different fields of study, such as biology, anthropology, palaeontology, medical sciences, archaeology, and engineering. For example, in evolutionary biology, ShapeRotator would allow analyses of multiple or articulated hard structures (such as different segments of an exoskeleton, different articulated bones, or neighbouring plant structures, among others), different structures from the same object or organism (e.g. different and not adjacent body parts), or pieces from damaged specimens. In medicine and veterinary science it could be used to examine shape and size variation in different organisms' growth due to different nutritional treatments or to examine how different structures respond to injuries or surgery. It would be useful in palaeontology or archaeology when trying to quantify shape of different objects or organisms that might have been preserved in disarticulated pieces.

## Acknowledgements

We are grateful to A. K. Singh and L. Bailey for their helpful comments on the manuscript. JSK thanks the Australian Research Council for ongoing support.

## 246 REFERENCES

- 247 Adams, D.C. & Otárola-Castillo, E. (2013). geomorph: an R package for the collection and analysis of  
248 geometric morphometric shape data. *Methods in Ecology and Evolution*, **4**, 393–399.
- 249 Adams, D.C., Rohlf, F.J. & Slice, D.E. (2013). A field comes of age: geometric morphometrics in the  
250 21st century. *Hystrix, the Italian Journal of Mammalogy*, **24**, 7–14.
- 251 Adams, D.C., Rohlf, F.J. & Slice, D.E. (2004). Geometric morphometrics: Ten years of progress  
252 following the ‘revolution’. *Italian Journal of Zoology*, **71**, 5–16.
- 253 Adams, D.C. (1999). Methods for shape analysis of landmark data from articulated structures.  
254 *Evolutionary Ecology Research*, **1**, 959–970.
- 255 Bookstein, F.L. (1997). Landmark methods for forms without landmarks: morphometrics of group  
256 differences in outline shape. *Medical Image Analysis*, **1**, 225–243.
- 257 Cornette, R., Baylac, M., Souter, T. & Herrel, A. (2013). Does shape co-variation between the skull  
258 and the mandible have functional consequences? A 3D approach for a 3D problem. *Journal of*  
259 *anatomy*, **223**, 329–36.
- 260 Ghalambor, C.K., McKay, J.K., Carroll, S.P. & Reznick, D.N. (2007). Adaptive versus non-adaptive  
261 phenotypic plasticity and the potential for contemporary adaptation in new environments.  
262 *Functional Ecology*, **21**, 394–407.
- 263 Klingenberg, C.P. (2011). MorphoJ: an integrated software package for geometric morphometrics.  
264 *Molecular ecology resources*, **11**, 353–357.
- 265 Klingenberg, C.P. (2008). Morphological Integration and Developmental Modularity. *Annual Review*  
266 *of Ecology, Evolution, and Systematics*, **39**, 115–132.
- 267 Loncaric, S. (1998). A survey of shape analysis techniques. *Pattern Recognition*, **31**, 983–1001.
- 268 Losos, J.B. (1990). The Evolution of Form and Function: Morphology and Locomotor Performance in  
269 West Indian Anolis Lizards. *Evolution*, **44**, 1189.
- 270 McIntyre, G.T. & Mossey, P.A. (2003). Size and shape measurement in contemporary cephalometrics.  
271 *The European Journal of Orthodontics*, **25**, 231–242.
- 272 Mitteroecker, P. & Gunz, P. (2009). Advances in Geometric Morphometrics. *Evolutionary Biology*, **36**,  
273 235–247.
- 274 Pagel, M. (1999). Inferring the historical patterns of biological evolution. *Nature*, **401**, 877–84.
- 275 Ricklefs, R.E. & Miles, D.B. (1994). Ecological and evolutionary inferences from morphology: an  
276 ecological perspective. In: *Ecological morphology: integrative organismal biology.*, pp. 13–41.  
277 University of Chicago Press, Chicago.
- 278 Shen, L., Farid, H. & McPeck, M.A. (2009). Modeling three-dimensional morphological structures  
279 using spherical harmonics. *Evolution*, **63**, 1003–16.
- 280 Slice, D.E. (2006). *Modern Morphometrics in Physical Anthropology*, Vol. 6n. Springer Science &  
281 Business Media.

282

## FIGURES

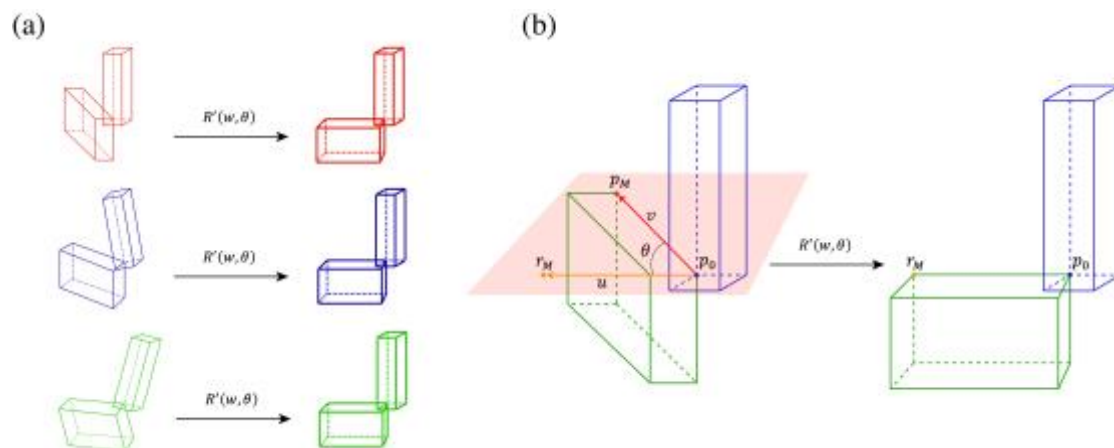

**Fig. 1.** (a) Application of the 3D rigid rotation method in three different scenarios, by rotating articulated structures to a standardised position relative to each other. (b) Rotation method exemplified by depicting the plane spanned by the already translated point  $p_M$  and  $A$ . Please note that  $p_0$  depicts the origin point (0, 0, 0). The rotated resulting point  $r_M$ , vectors  $u$  and  $v$ , and angle  $\theta$  are also depicted.

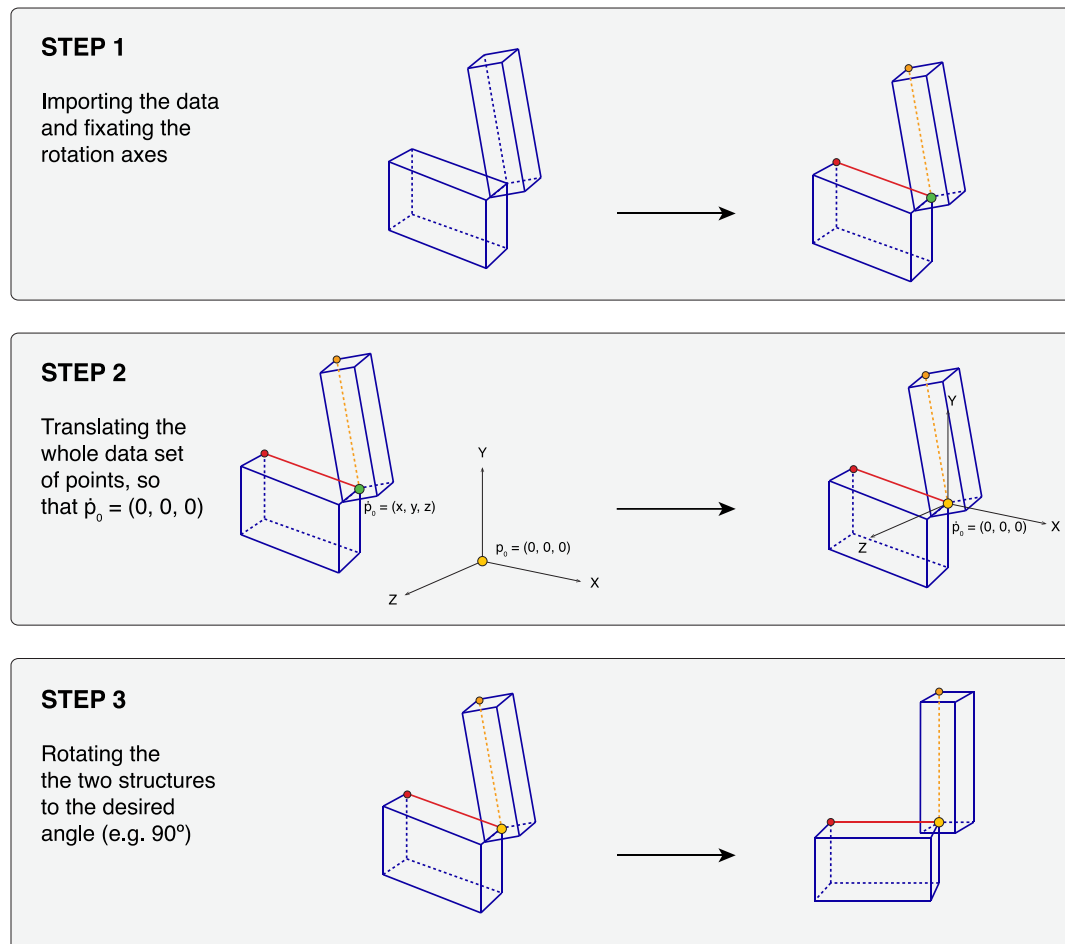

289

290 **Fig. 2.** Overview of the steps required in ShapeRotator, in order to rigidly rotate two articulated  
 291 subunits. Step 1: importing the data and fixating the rotation axes; Step 2: translating the whole data set  
 292 of coordinates or points so that the main selected point  $\tilde{p}_0 = (0, 0, 0)$ , with the function *translate()*; and  
 293 Step 3: rotating the two structures to the desired angle (e.g. 90 degrees), with the function *rotator()*.
